# Supplementary material for: The Dual PDZ Domain from Postsynaptic Density Protein 95 Forms a Scaffold with Peptide Ligand
Source: PubMed Central journal article supplement (PMC7399497; doi:10.1016/j.bpj.2020.06.018), 2020-06-26
Supplement: mmc1.pdf [file mmc1.pdf]

**Biophysical Journal, Volume 119**

**Supplemental Information**

**The Dual PDZ Domain from Postsynaptic Density Protein 95 Forms a Scaffold with Peptide Ligand**

**Nazahiyah A. Rodzli, Michael P. Lockhart-Cairns, Colin W. Levy, John Chipperfield, Louise Bird, Clair Baldock, and Stephen M. Prince**

# Supplementary materials

**Table S1. X-ray Crystallography**

|                                                                                           | apo-PDZ1-2                                            | RRESEI-PDZ1-2                                       |
|-------------------------------------------------------------------------------------------|-------------------------------------------------------|-----------------------------------------------------|
| Beamline; detector                                                                        | Diamond Light Source (DLS) station IO4;<br>PILATUS 2M | DLS IO4-1; PILATUS 6M                               |
| Wavelength; crystal-detector distance; image width; exposure; image number                | 0.920Å; 249.77mm; 0.25°; 0.2s; 720+280                | 0.979Å; 264.97mm; 0.25°; 0.1s;<br>400+400           |
| Spacegroup and unit cell                                                                  | I4 <sub>1</sub> ; a=50.38; c=178.27Å                  | I4 <sub>1</sub> ; a=50.50; c=176.37Å                |
| Resolution; Rmerge; I/σ(I). Figures in parenthesis are for the highest resolution shell.  | 48.48-2.04 (2.09-2.04)Å; 5 (54.7)%; 24.4 (2.8)        | 48.55-2.08 (2.13-2.08)Å; 7.5 (53.8)%;<br>14.5 (2.7) |
| Completeness; multiplicity Figures in parenthesis are for the highest resolution shell.   | 98.8 (93.8)%; 5.4 (2.8)                               | 99.6 (97.8)%; 3.4 (1.8)                             |
| Number reflections (test set); Rcryst; Rfree.                                             | 13,259 (735); 22.4%; 26.0%                            | 12,513 (703); 20.0%; 24.0%                          |
| Residue range PSD95; Kir2.1 peptide ligand at PDZ1 & PDZ2; GSH; number of water molecules | 58-246; n/a & n/a; 1; 40                              | 58-246; 422-427 & 422-427; 1; 56                    |
| Root mean square deviation bond lengths; bond angles from ideal values.                   | 0.006Å; 0.996°                                        | 0.006Å; 1.139°                                      |

**Table S2. Small angle X-ray Scattering data sets**

| date                                                  | June '15                                                                              |                       |                     |                     | September '16                                                                      |                    |                    |                     | Jan '16                                                                  |                      |                      | Jun '16                                                                          |                    |
|-------------------------------------------------------|---------------------------------------------------------------------------------------|-----------------------|---------------------|---------------------|------------------------------------------------------------------------------------|--------------------|--------------------|---------------------|--------------------------------------------------------------------------|----------------------|----------------------|----------------------------------------------------------------------------------|--------------------|
| Beamline;<br>geometry;<br>wavelength;<br>q-range      | DESY P12 beamline; fixed sample concentration;<br>1.24Å; $\infty - 0.48\text{Å}^{-1}$ |                       |                     |                     | DLS B21 beamline; fixed sample concentration;<br>1.0Å; $\infty - 0.4\text{Å}^{-1}$ |                    |                    |                     | DLS B21; Paused Size exclusion run;<br>1.0Å; $\infty - 0.4\text{Å}^{-1}$ |                      |                      | DLS B21; integrated<br>size exclusion peak;<br>1.0Å; $\infty - 0.4\text{Å}^{-1}$ |                    |
| PDZ1-2 Data<br>set name                               | Conc. Apo                                                                             | Dil. Apo              | Conc.<br>+RRESEI    | Dil.<br>+RRESEI     | Conc. Apo                                                                          | Dil. Apo           | Conc.<br>+GSH      | Dil. +GSH           | SEC. Apo.                                                                | SEC.<br>+RRESEI      | SEC.+GSH             | SEC. Apo.                                                                        | SEC.+GSH           |
| Total Protein<br>concentration<br>(mM)                | 0.72                                                                                  | 0.36                  | 0.72                | 0.36                | 0.36                                                                               | 0.18               | 0.36               | 0.18                | <0.18                                                                    | <0.18                | <0.18                | <0.18                                                                            | <0.18              |
| Ligand (Ligand<br>concentration,<br>mM)               | N/A                                                                                   | N/A                   | RRESEI<br>(10)      | RRESEI<br>(5)       | N/A                                                                                | N/A                | GSH (10)           | GSH (16)            | N/A                                                                      | RRESEI<br>(<10)      | GSH (<10)            | N/A                                                                              | GSH (5)            |
| Guinier $R_g$ ,<br>(error) Å; I(0)<br>arbitrary units | 23.76(0.06);<br>19483                                                                 | 24.81(0.10);<br>17355 | 29.7(1.0);<br>47587 | 26.6(1.4);<br>53491 | 27.0(1.2);<br>0.12                                                                 | 26.5(2.8)<br>0.039 | 28.2(2.2);<br>0.14 | 31.1(2.2);<br>0.072 | 24.4(0.2);<br>0.017                                                      | 23.5(1.3);<br>0.0096 | 23.6(0.7);<br>0.0077 | 22.9(0.8);<br>0.012                                                              | 23.0(1.0);<br>0.01 |
| P(r) $R_g$ ; $D_{max}$ Å                              | 24.6; 92                                                                              | 25.7; 100             | 31.2; 131           | 28.6; 125           | 26.0; 90                                                                           | 25.5; 80           | 27.6; 95           | 31.4; 106           | 24.9; 94                                                                 | 24.0; 87             | 24.0; 78             | 23.5; 80                                                                         | 23.4; 77           |

June'16 data are not included in the detailed analysis – these data gave results equivalent to the corresponding data sets collected in Jan'16.

DESY; Deutsches Elektronen-Synchrotron, Hamburg, Germany. DLS; Diamond Light Source, Didcot, UK.

PDZ1-2 residues 55-246 of human PSD-95 preceded by Gly-Pro (from the cleaved affinity tag); N/A, not applicable; RRESEI, synthetic peptide of corresponding single letter amino acid sequence; GSH, reduced Glutathione;  $R_g$  Radius of Gyration; I(0) Intensity at momentum transfer value of 0, P(r) pair distribution function (of distance r);  $D_{max}$ , maximum extent of molecule.

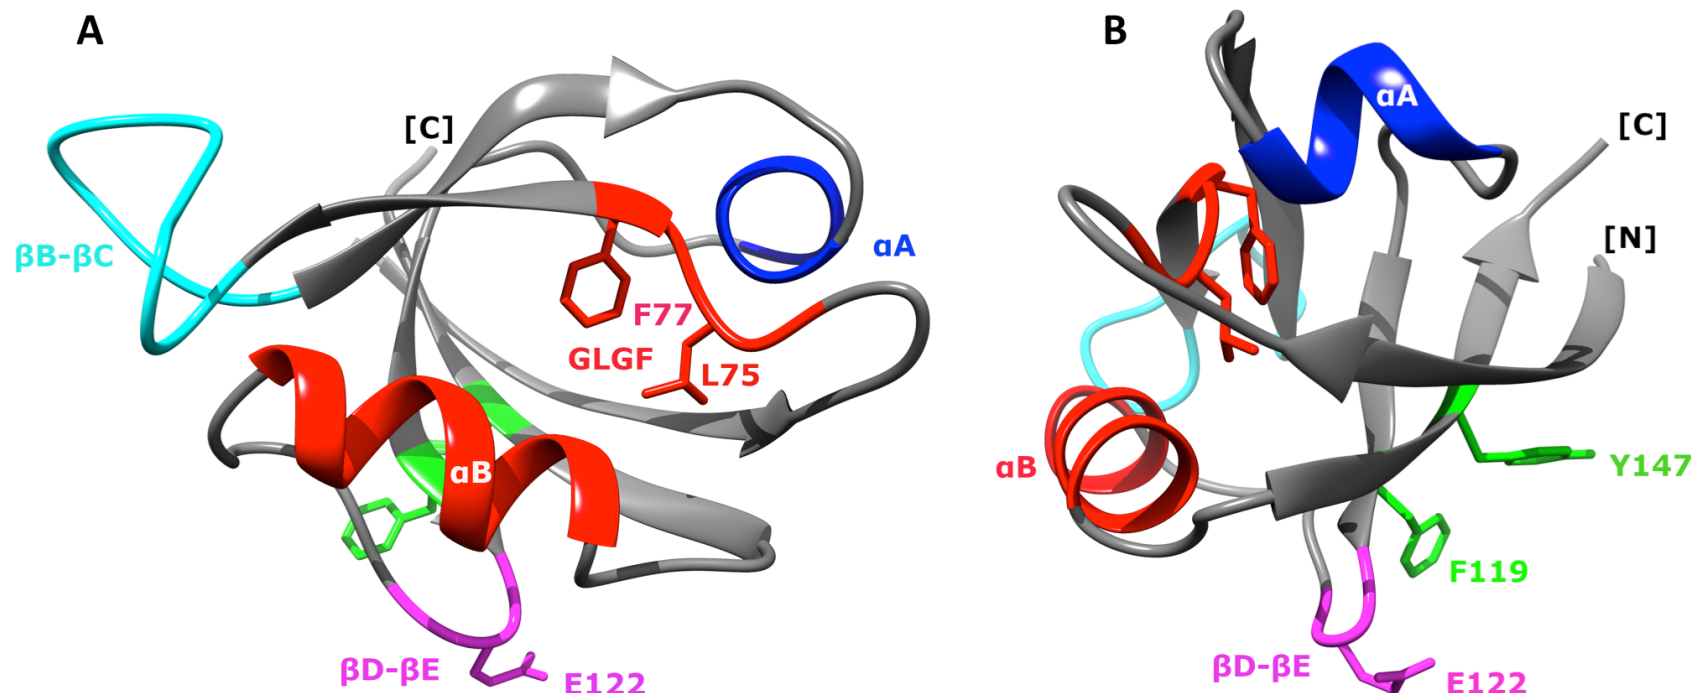

**Figure S1. Structural elements of PDZ1 involved in interaction.**

A, and B show two orientations of the PDZ1 domain from PSD-95 in grey with structural elements highlighted in colour. The N- and C-terminus of the domain are labelled in square parenthesis. The ligand binding cleft formed between the GLGF motif (labelled, and containing residues Leu 75 and Phe 77) and  $\alpha$ B helix is shown in red. The  $\beta$ D- $\beta$ E loop containing Glu 122 is shown in magenta. The  $\alpha$ A helix is shown in blue and the long  $\beta$ B- $\beta$ C loop in cyan. Residues F119 and Y147 on the  $\beta$ D and  $\beta$ F strands of PDZ1 respectively are shown in green. The PDZ2 domain has a similar structure and also contains a GLGF motif,  $\alpha$ A helix,  $\alpha$ B helix, and a long  $\beta$ B- $\beta$ C loop.

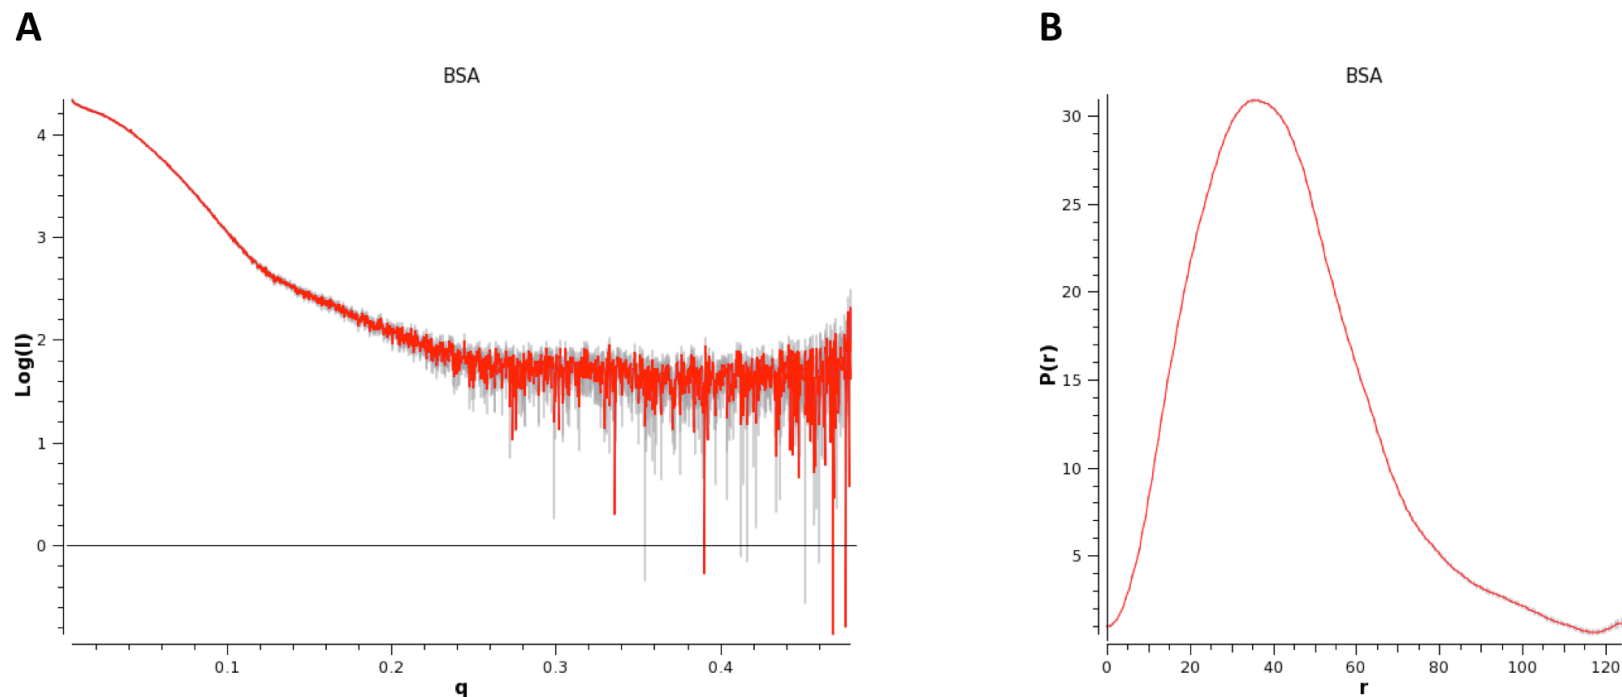

**Figure S2. Bovine Serum Albumen (BSA) SAXS data collected at DESY P12, June'15.**

Scattering data from a sample of Bovine Serum Albumin at a concentration of  $5.2 \text{ mg ml}^{-1}$  in HEPES buffer was measured alongside RRESEI-PDZ1-2 and apo-PDZ1-2 data sets at beamline P12 of the Petra PIII (June 15 data). Background subtracted scattering data plotted as  $\text{Log}(I)$  versus momentum transfer  $q$  ( $\text{\AA}^{-1}$ ) are shown in A. The corresponding pair distance distribution curve is shown in B.  $P(r)$  Data points are shown in red, error bars in black.  $P(r)$  is plotted against distance,  $r$  ( $\text{\AA}$  units) ( $P(0)=P(D_{\text{max}})=0$  is not imposed).

Values of  $I(0)$  and  $R_g$  for BSA were obtained from the Guinier plot as  $1.879 \times 10^4$  and  $33.1 \text{ \AA}$ . Using the standards obtained for BSA and the  $I(0)$  values given in Table S2 the derived concentrations for apo-PDZ1-2 were  $5.4$  and  $4.8 \text{ mg ml}^{-1}$  for Jun'15 concentrated and diluted samples respectively. For RRESEI-PDZ1-2 the  $I(0)$  derived concentrations were  $13.2$  and  $14.8 \text{ mg ml}^{-1}$  for concentrated and diluted samples respectively. These figures are clearly at variance with the dilutions – in particular for the RRESEI-PDZ1-2 data where the derived concentration is higher for the diluted sample. The conversion of the individual curves to an absolute scale would propagate these anomalies.

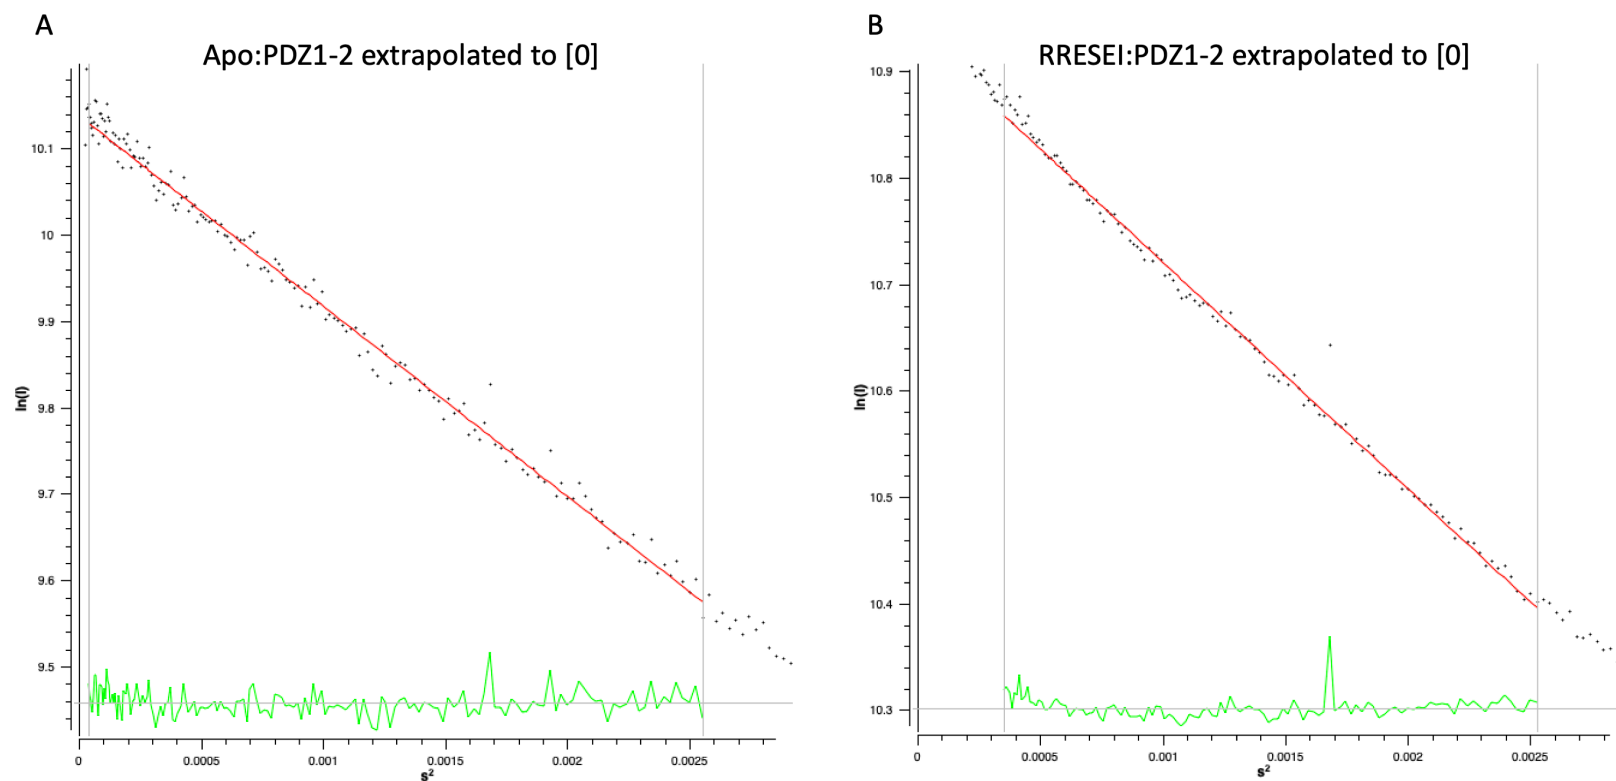

**Figure S3. Guinier plots for apo-PDZ1-2 and RRESEI-PDZ1-2 data extrapolated to zero concentration.**

The Guinier plots for Apo-PDZ1-2 and RRESEI-PDZ1-2 data extrapolated to zero concentration are shown in A and B respectively. Data points are black and the fitted line is shown in red,  $s^2$  denotes the square of the momentum transfer. The Green curve plots the difference between the fit and observed data. The  $I(0)$ ,  $R_g$  are 25281(42), 25.71(20)Å and 56054(113), 25.28(36)Å for Apo-PDZ1-2 and RRESEI-PDZ1-2 respectively.

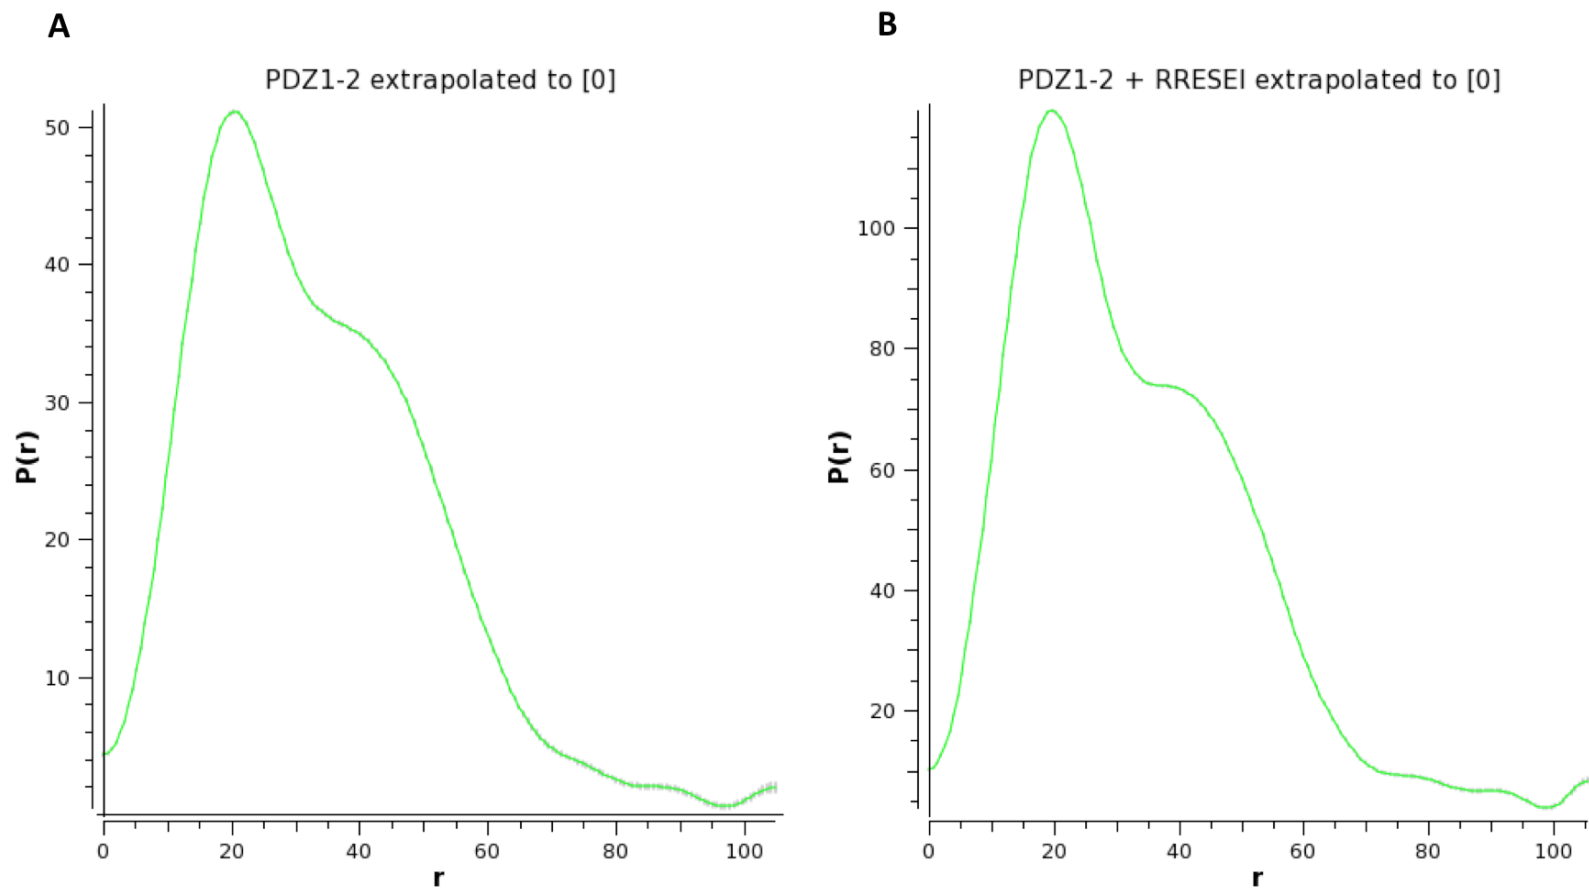

**Figure S4. Pair distance distribution curves for apo-PDZ1-2 and RRESEI-PDZ1-2 extrapolated to zero concentration.**

Pair distance distribution  $P(r)$  curves for apo-PDZ1-2 (A) and RRESEI-PDZ1-2 (B) data extrapolated to zero concentration plotted against distance,  $r$  (Å units). Data points are shown in green, error bars in black.  $P(0)=P(D_{\max})=0$  was not imposed in the calculation of  $P(r)$ .

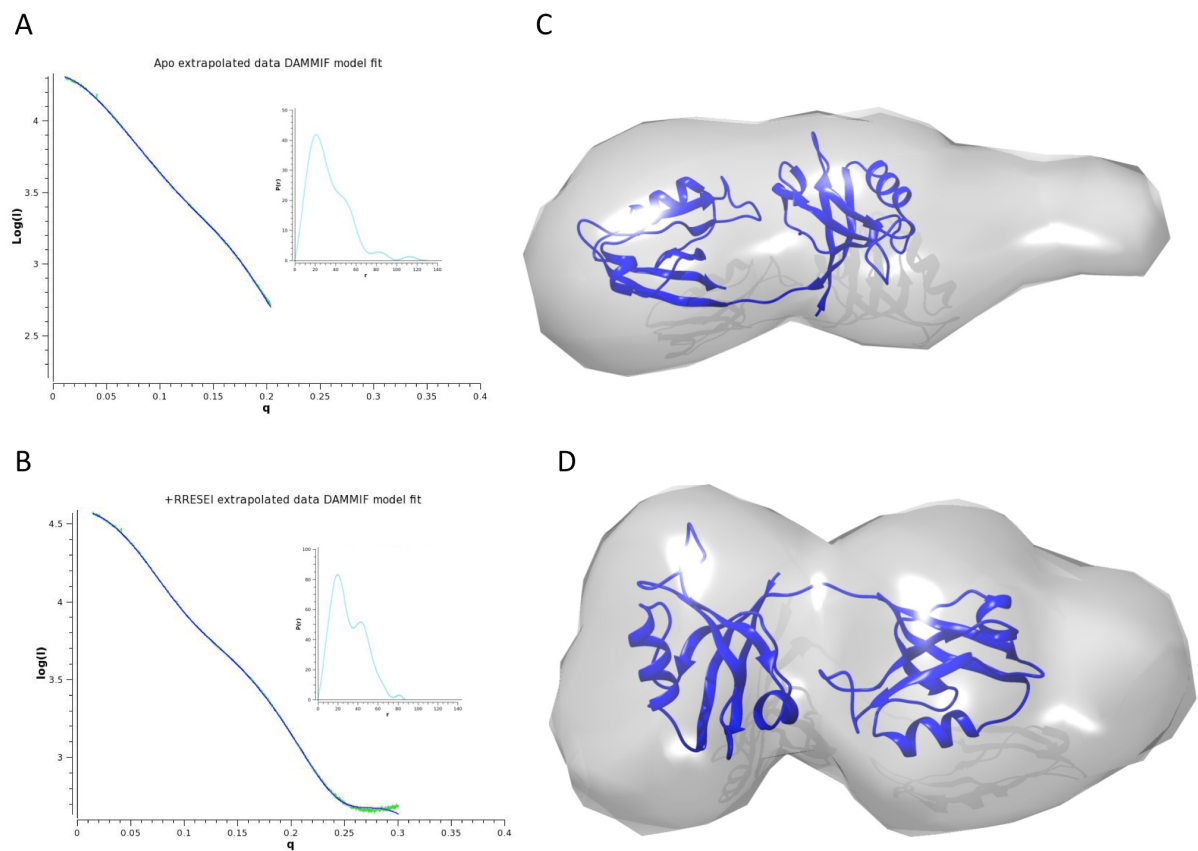

**Figure S5. *Ab-initio* modelling from apo-PDZ1-2 and RRESEI-PDZ1-2 data extrapolated to zero concentration.**

The fit of a representative dummy atom model derived from the program DAMMIF to the extrapolated data is shown in A for apo-PDZ1-2 and B, RRESEI-PDZ1-2. The curve calculated from the dummy atom model is shown in blue, data points in green,  $q$  in units of  $\text{\AA}^{-1}$ . Inset are the corresponding pair distance distribution curves  $P(r)$  plotted against distance in cyan,  $r$  ( $\text{\AA}$  units) (here  $P(0)=P(D_{\text{max}})=0$  was imposed). The corresponding dummy atom models are shown in C (apo-PDZ1-2) and D (RRESEI-PDZ1-2). DAMMIF models are represented as an envelope with the PDZ1-2 crystal structure reported here docked for scale. The envelope resolution matches the high  $q$  limit of the (truncated) data used. Model diagrams produced in UCSF Chimera.



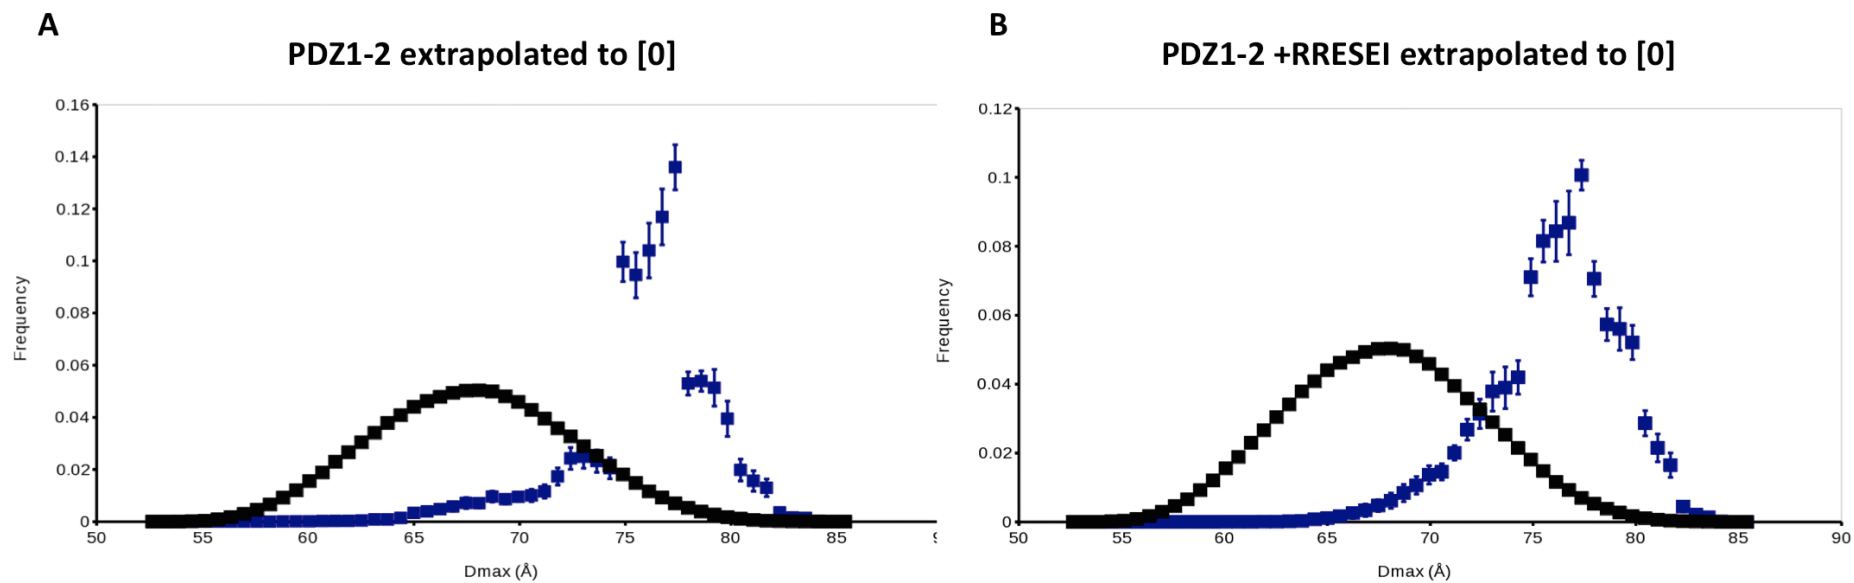

**Figure S6.  $D_{\max}$  Ensemble model analysis histograms.**

The  $D_{\max}$  histograms for the models selected in ensemble model analysis are shown for SAXS data extrapolated to infinite dilution (A, apo-PDZ1-2 and B, RRESEI-PDZ1-2). These graphs correspond to those shown for  $R_g$  in Figure 2 E, F. The model population is plotted on the ordinate and  $D_{\max}$  on the abscissa, black points are pool models and blue points are models selected from the pool, with error bars calculated as the standard deviation of 20 duplicate runs.

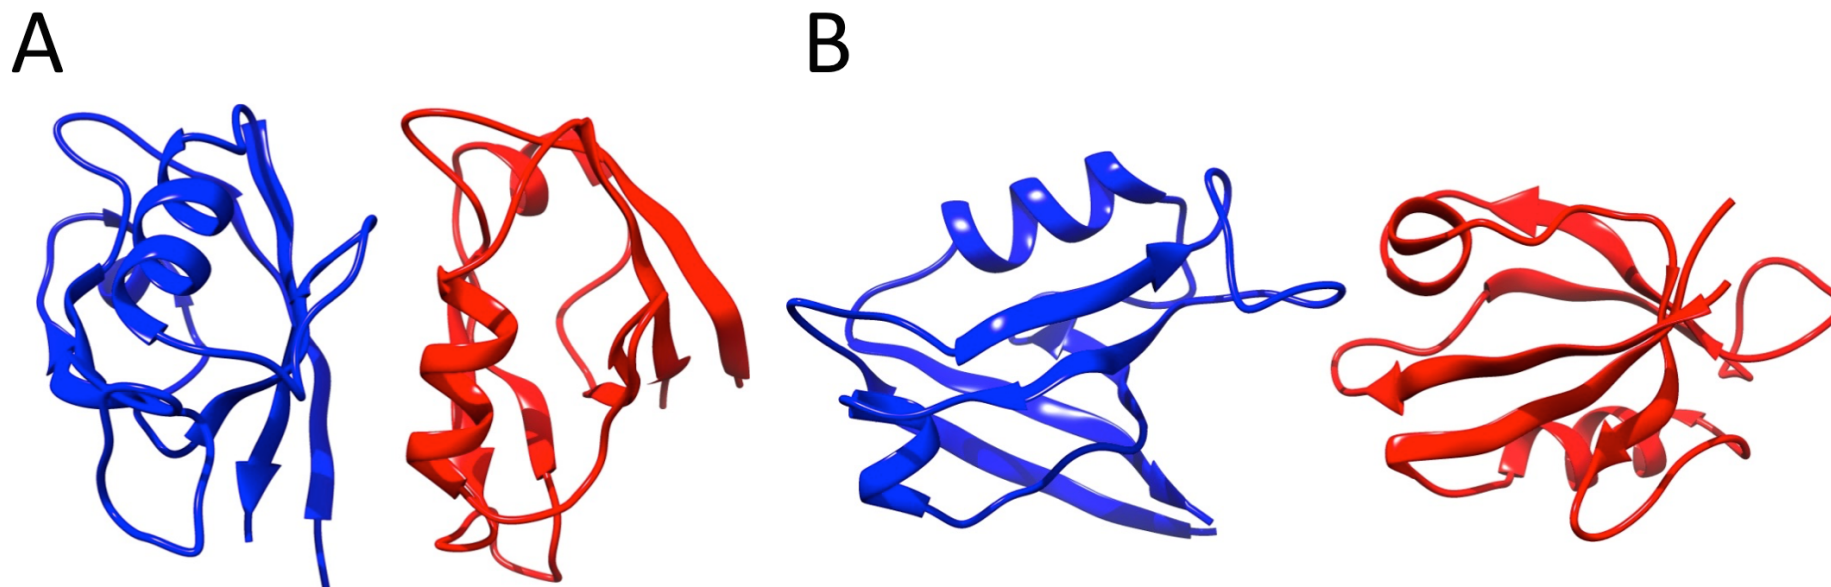

**Figure S7. Crystal contacts used in the construction of oligomeric models.**

The structures of PDZ domains are shown in cartoon form with secondary structure elements highlighted in a similar manner to Figure 1. PDZ1 is coloured blue and PDZ2 red. The  $\alpha\text{B(PDZ2)}-\beta\text{D}-\beta\text{E(PDZ1)}$  interface present in the 3zrt and 3gsl crystal structures is shown in A. The  $\alpha\text{A(PDZ2)}-\beta\text{B}-\beta\text{C(PDZ1)}$  interface from the 3gsl crystal structure is shown in B.

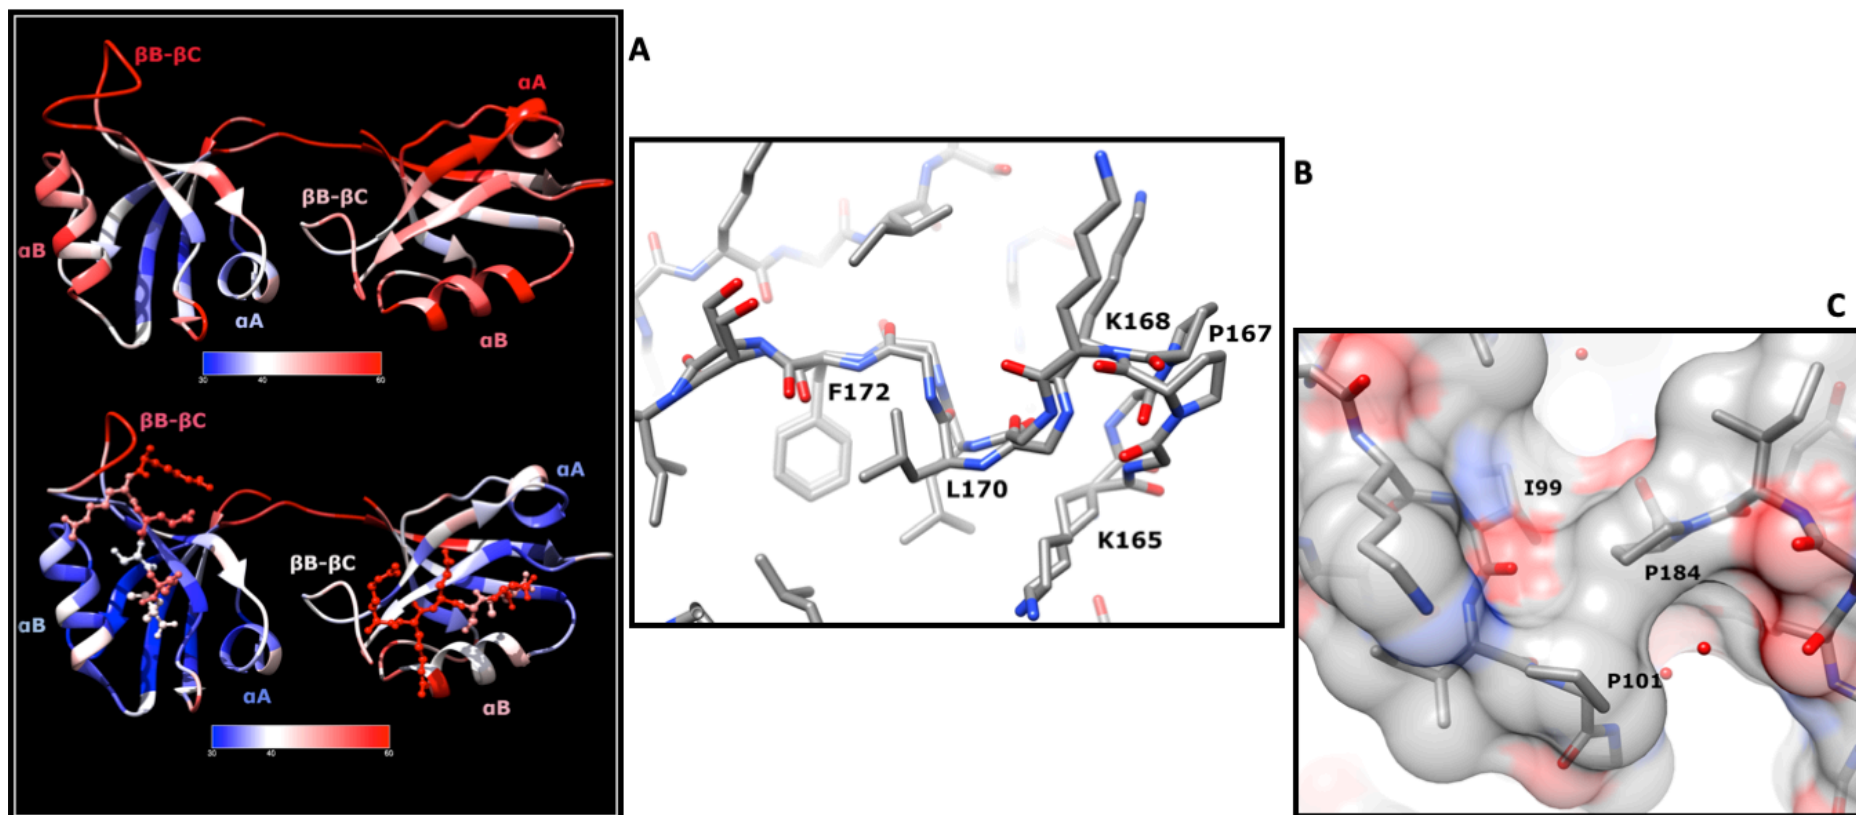

**Figure S8. The relationship between contacts and order in the PDZ1-2 crystal structure.**

For panel A the structures of apo-PDZ1-2 (top) and RRESEI-PDZ1-2 (bottom) were re-refined without alternate conformations and with isotropic B-factors- The mean isotropic B-factors of residues are represented on the colour scale indicated. PDZ1-2 is shown in cartoon form as in Figure 1, RRESEI is in ball-and stick form, GSH is omitted. The  $\alpha A$  and  $\alpha B$  helix, and  $\beta B-\beta C$  loop of each domain is labelled. In B the refined dual conformation of the GLG(F) containing  $\beta A-\beta B$  loop of apo-PDZ2 is shown the structure is shown in stick form with colours representing the connected atoms (C, grey; N, blue; O, red). In C the PDZ1( $\alpha A$ )-PDZ2( $\beta B-\beta C$ ) contact formed in both apo-PDZ1-2 and RRESEI-PDZ1-2 structures is shown with a molecular surface overlaid to indicate the exclusion of water from this contact. The stick representation of PDZ1-2, the overlaid semi-transparent surface and water oxygens (red spheres) are coloured according to atomic species as in B.

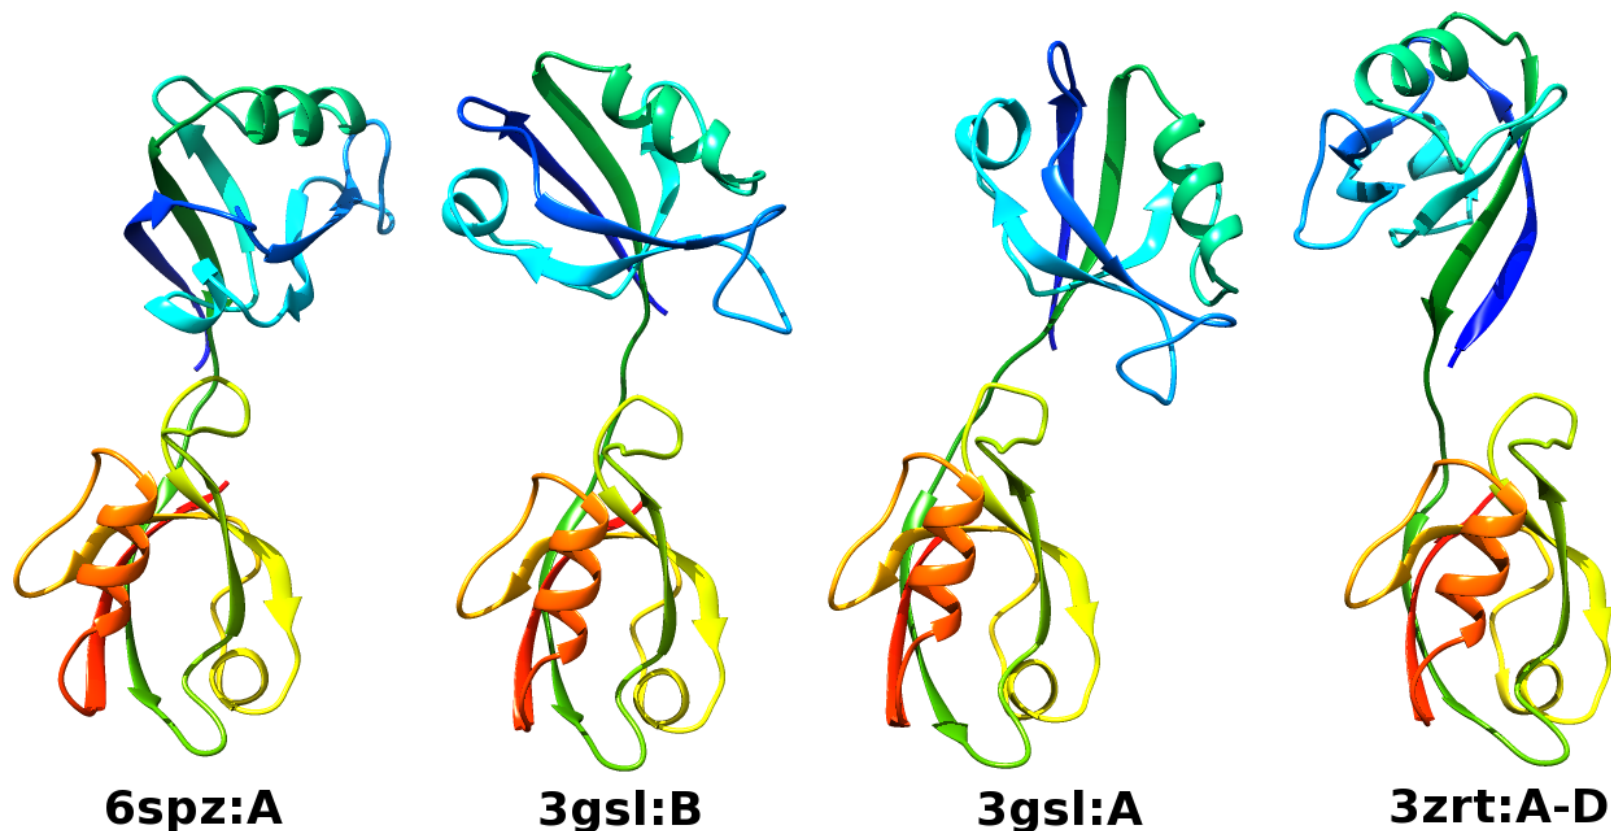

**Figure S9. Tandem PDZ1-2 domain crystal structures.**

The four crystal structures of PDZ1-2 are shown represented in cartoon form in a similar way to Figure 1 with labels of the form “PDBID:chainID”. The compact form of PDZ1-2 from human PSD-95 reported here is shown labelled as 6spz:A; the two conformations of PDZ1-2 from rat PSD-95 3gsl:A and 3gsl:B, and the extended version of human PSD-95 3zrt:A-D.

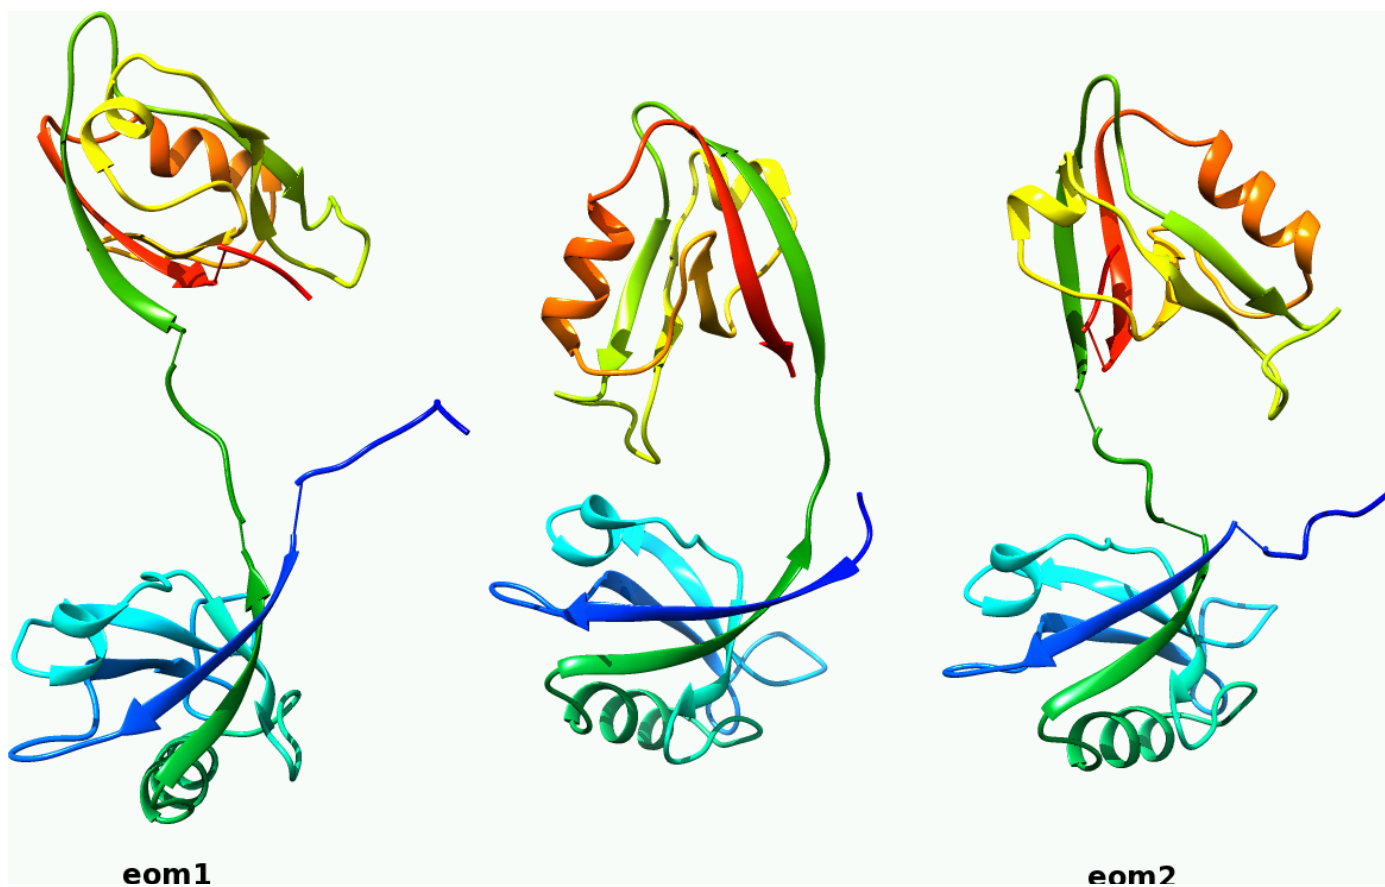

**Figure S10. The eom1 and eom2 models used in oligomer-based fitting.**

The compact form of PDZ1-2 (corresponding to the crystal structure reported here) is shown in the centre. Molecules are represented in a similar fashion to Figure 1. C-terminal, N-terminal and PDZ1-PDZ2 connecting C $\alpha$  loop models added in the EOM analysis for eom1 & 2 are shown connected by thin bonds.

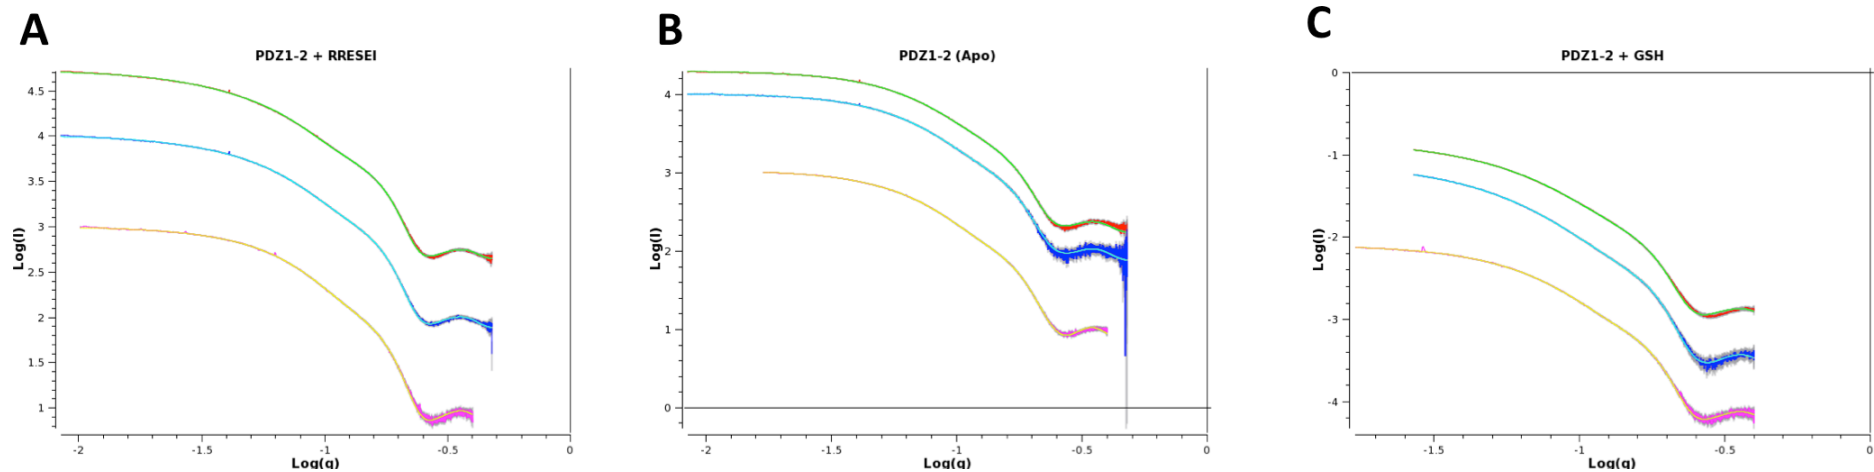

**Figure S11.  $\text{Log}(I)$  versus  $\text{Log}(q)$  plots of the final oligomer fits.**

Transformed plots of RRESEI-PDZ1-2, A; apo-PDZ1-2, B, and GSH-PDZ1-2, C, corresponding to those in Figure 5 are shown. High concentration data curves are shown in red with fitted curves in green, dilutions in blue with fitted curve in cyan and SEC-fractionated samples in magenta with fitted curves in yellow. A multiplication factor has been applied to the raw data in some cases to separate curves along the ordinate ( $\text{Log}(I)$ ) axis.

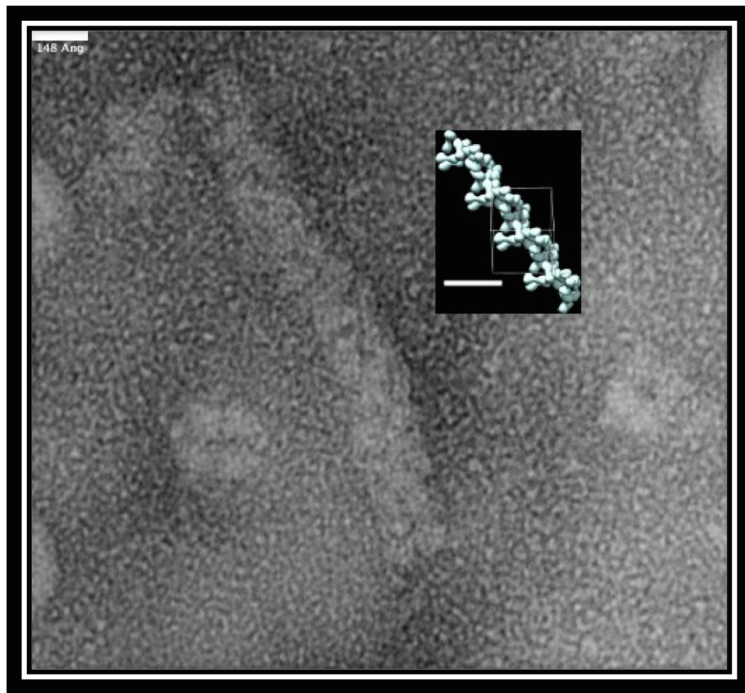

**Figure S12. Higher order complexes formed between PSD-95 and the cytoplasmic domain of Kir2.1.**

The electron micrograph shown was selected from data for PSD-95 and Kir2.1 complexes (1) and rendered with ImageJ software (2), large complexes are presumed to be formed from full-length PSD-95 and the tetrameric cytoplasmic domain of Kir2.1 (all components in the solution phase, expressed in *E. coli* and assembled *in vitro*). The inset is an oligomer of PDZ1-2 drawn from the scaffolding Spacegroup and coincident with the  $3_1$  screw axis shown as a molecular surface in a similar manner to Figure 6. A scalebar for the micrograph is shown top left (148 Å) with a matching scalebar on the molecular image – the inset is on approximately the same scale as the micrograph.

## Supporting References

1. Fomina S, Howard TD, Sleator OK, Golovanova M, O'Ryan L, Leyland ML, et al. Self-directed assembly and clustering of the cytoplasmic domains of inwardly rectifying Kir2.1 potassium channels on association with PSD-95. *Biochimica et biophysica acta*. 2011;1808(10):2374-89.
2. Schneider CA, Rasband WS, Eliceiri KW. NIH Image to ImageJ: 25 years of image analysis. *Nature methods*. 2012;9(7):671-5.
